# Supplementary material for: Low-lying states of MX2 (M = Ag, Au; X = Cl, Br and I) with coupled-cluster approaches: effect of the basis set, high level correlation and spin–orbit coupling
Source: Royal Society of Chemistry journal article supplement (doi:10.1039/d0cp04988c), 2020-01-01
Supplement: d0cp04988c1.pdf [file d0cp04988c1.pdf]

## Supporting Information

### **Low-lying states of $\text{MX}_2$ (M=Ag, Au; X=Cl, Br and I) with coupled-cluster approaches: effect of basis set, high level correlation and spin-orbit coupling**

Xingxing Pang<sup>a</sup>, Minggang Guo<sup>a</sup>, Zhifan Wang<sup>b</sup> and Fan Wang<sup>\*a</sup>

<sup>a</sup>Institute of Atomic and Molecular Physics, Key Laboratory of High Energy Density Physics and  
Technology, Ministry of Education, Sichuan University, Chengdu, P. R. China

<sup>b</sup>College of Chemistry and Life Science, Sichuan Provincial Key Laboratory for Structural Optimization  
and Application of Functional Molecules, Chengdu Normal University, Chengdu, P. R. China

**Table S1** Vertical excitation energies in scalar-relativistic calculations (in eV) at the equilibrium structure of the  ${}^1\Sigma_g^+$  state of  $\text{MX}_2^-$

| State            | CCSD  | CCSD(T) | EOMIP | Calc. <sup>1</sup> | State            | CCSD  | CCSD(T) | EOMIP | Calc. <sup>2</sup> |
|------------------|-------|---------|-------|--------------------|------------------|-------|---------|-------|--------------------|
| $\text{AgCl}_2$  |       |         |       |                    | $\text{AuCl}_2$  |       |         |       |                    |
| ${}^2\Pi_g$      |       |         |       |                    | ${}^2\Pi_g$      |       |         |       |                    |
| ${}^2\Sigma_g^+$ | 0.009 | 0.156   | 0.136 | -0.124             | ${}^2\Sigma_g^+$ | 0.360 | 0.537   | 0.565 | 0.489              |
| ${}^2\Pi_u$      | 0.846 | 0.862   | 0.890 | 1.017              | ${}^2\Pi_u$      | 1.602 | 1.514   | 1.611 | 1.445              |
| ${}^2\Sigma_u^+$ | 0.996 | 1.099   | 1.140 | 1.245              | ${}^2\Delta_g$   | 1.408 | 1.604   | 1.727 |                    |
| ${}^2\Delta_g$   | 1.918 | 2.163   | 2.315 | 2.144              | ${}^2\Sigma_u^+$ | 1.736 | 1.794   | 1.875 | 1.763              |
| $\text{AgBr}_2$  |       |         |       |                    | $\text{AuBr}_2$  |       |         |       |                    |
| ${}^2\Pi_g$      |       |         |       |                    | ${}^2\Pi_g$      |       |         |       |                    |
| ${}^2\Sigma_g^+$ | 0.331 | 0.436   | 0.424 | 0.263              | ${}^2\Sigma_g^+$ | 0.574 | 0.761   | 0.798 | 0.718              |
| ${}^2\Pi_u$      | 0.652 | 0.663   | 0.682 | 0.654              | ${}^2\Pi_u$      | 1.206 | 1.166   | 1.244 | 1.108              |
| ${}^2\Sigma_u^+$ | 0.815 | 0.909   | 0.943 | 0.875              | ${}^2\Sigma_u^+$ | 1.352 | 1.450   | 1.512 | 1.414              |
| ${}^2\Delta_g$   | 2.243 | 2.455   | 2.651 | 2.641              | ${}^2\Delta_g$   | 1.551 | 1.764   | 1.910 |                    |
| $\text{AgI}_2$   |       |         |       |                    | $\text{AuI}_2$   |       |         |       |                    |
| ${}^2\Pi_g$      |       |         |       |                    | ${}^2\Pi_g$      |       |         |       |                    |
| ${}^2\Pi_u$      | 0.501 | 0.501   | 0.516 | 0.486              | ${}^2\Pi_u$      | 0.880 | 0.861   | 0.908 | 0.823              |
| ${}^2\Sigma_u^+$ | 0.648 | 0.730   | 0.757 | 0.697              | ${}^2\Sigma_u^+$ | 0.996 | 1.112   | 1.139 | 1.099              |
| ${}^2\Sigma_g^+$ | 0.719 | 0.775   | 0.762 | 0.642              | ${}^2\Sigma_g^+$ | 0.969 | 1.148   | 1.145 | 1.120              |
| ${}^2\Delta_g$   | 2.717 | 2.903   | 3.129 | 3.190              | ${}^2\Delta_g$   | 1.895 | 2.114   | 2.242 |                    |

**Table S2** Vertical excitation energies in scalar-relativistic calculations (in eV) at the equilibrium structure of the  $^2\Pi_g$  state of  $MX_2$

| State             | CCSD  | CCSD(T) | EOMIP | Calc. <sup>3,4</sup> | State             | CCSD  | CCSD(T) | EOMIP |
|-------------------|-------|---------|-------|----------------------|-------------------|-------|---------|-------|
| AgCl <sub>2</sub> |       |         |       |                      | AuCl <sub>2</sub> |       |         |       |
| $^2\Pi_g$         |       |         |       |                      | $^2\Pi_g$         |       |         |       |
| $^2\Sigma_g^+$    | 0.011 | 0.160   | 0.154 | 0.204                | $^2\Sigma_g^+$    | 0.578 | 0.747   | 0.752 |
| $^2\Pi_u$         | 1.170 | 1.155   | 1.224 |                      | $^2\Pi_u$         | 1.675 | 1.862   | 1.949 |
| $^2\Sigma_u^+$    | 1.306 | 1.376   | 1.446 |                      | $^2\Delta_g$      | 1.988 | 1.879   | 1.983 |
| $^2\Delta_g$      | 2.013 | 2.249   | 2.388 | 2.265                | $^2\Sigma_u^+$    | 2.115 | 2.143   | 2.221 |
| AgBr <sub>2</sub> |       |         |       |                      | AuBr <sub>2</sub> |       |         |       |
| $^2\Pi_g$         |       |         |       |                      | $^2\Pi_g$         |       |         |       |
| $^2\Sigma_g^+$    | 0.343 | 0.466   | 0.445 |                      | $^2\Sigma_g^+$    | 0.767 | 0.945   | 0.958 |
| $^2\Pi_u$         | 0.856 | 0.863   | 0.888 |                      | $^2\Pi_u$         | 1.501 | 1.442   | 1.521 |
| $^2\Sigma_u^+$    | 1.013 | 1.101   | 1.131 |                      | $^2\Sigma_u^+$    | 1.646 | 1.717   | 1.772 |
| $^2\Delta_g$      | 2.295 | 2.517   | 2.675 |                      | $^2\Delta_g$      | 1.776 | 1.978   | 2.086 |
| AgI <sub>2</sub>  |       |         |       |                      | AuI <sub>2</sub>  |       |         |       |
| $^2\Pi_g$         |       |         |       |                      | $^2\Pi_g$         |       |         |       |
| $^2\Pi_u$         | 0.611 | 0.609   | 0.627 |                      | $^2\Pi_u$         | 1.042 | 1.013   | 1.067 |
| $^2\Sigma_u^+$    | 0.752 | 0.830   | 0.854 |                      | $^2\Sigma_u^+$    | 1.111 | 1.284   | 1.270 |
| $^2\Sigma_g^+$    | 0.755 | 0.823   | 0.800 | 0.926                | $^2\Sigma_g^+$    | 1.156 | 1.255   | 1.284 |
| $^2\Delta_g$      | 2.757 | 2.951   | 3.144 | 3.244                | $^2\Delta_g$      | 2.053 | 2.267   | 2.370 |

**Table S3** Vertical excitation energies and composition of the SO eigenstates in terms of SO-free states for MX<sub>2</sub> at the equilibrium structure of the <sup>2</sup>Π<sub>g</sub> state. All energies are in eV.

| State             | Composition                                                                       | Calc. | Calc. <sup>3-5</sup> | State             | Composition                                                                       | Calc. | Expt. <sup>6</sup> |
|-------------------|-----------------------------------------------------------------------------------|-------|----------------------|-------------------|-----------------------------------------------------------------------------------|-------|--------------------|
| AgCl <sub>2</sub> |                                                                                   |       |                      | AuCl <sub>2</sub> |                                                                                   |       |                    |
| 3/2g              | <sup>2</sup> Π <sub>g(0.93)</sub>                                                 |       |                      | 3/2g              | <sup>2</sup> Π <sub>g(0.91)</sub> <sup>2</sup> Δ <sub>g(0.02)</sub>               |       |                    |
| 1/2g              | <sup>2</sup> Π <sub>g(0.73)</sub> <sup>2</sup> Σ <sub>g</sub> <sup>+</sup> (0.21) | 0.02  | 0.06                 | 1/2g              | <sup>2</sup> Π <sub>g(0.78)</sub> <sup>2</sup> Σ <sub>g</sub> <sup>+</sup> (0.16) | 0.20  | 0.23               |
| 1/2g              | <sup>2</sup> Σ <sub>g</sub> <sup>+</sup> (0.73) <sup>2</sup> Π <sub>g(0.21)</sub> | 0.23  | 0.47                 | 1/2g              | <sup>2</sup> Σ <sub>g</sub> <sup>+</sup> (0.77) <sup>2</sup> Π <sub>g(0.18)</sub> | 1.09  | 0.99               |
| 3/2u              | <sup>2</sup> Π <sub>u(0.94)</sub>                                                 | 1.25  |                      | 5/2g              | <sup>2</sup> Δ <sub>g(0.93)</sub>                                                 | 1.57  | 1.44               |
| 1/2u              | <sup>2</sup> Π <sub>u(0.93)</sub>                                                 | 1.26  |                      | 3/2u              | <sup>2</sup> Π <sub>u(0.93)</sub>                                                 | 2.18  | 1.57               |
| 1/2u              | <sup>2</sup> Σ <sub>u</sub> <sup>+</sup> (0.93)                                   | 1.48  |                      | 1/2u              | <sup>2</sup> Π <sub>u(0.87)</sub> <sup>2</sup> Σ <sub>u</sub> <sup>+</sup> (0.06) | 2.19  |                    |
| 5/2g              | <sup>2</sup> Δ <sub>g(0.93)</sub>                                                 | 2.23  | 2.15                 | 1/2u              | <sup>2</sup> Σ <sub>u</sub> <sup>+</sup> (0.85) <sup>2</sup> Π <sub>u(0.08)</sub> | 2.47  |                    |
| 3/2g              | <sup>2</sup> Δ <sub>g(0.87)</sub> <sup>2</sup> Π <sub>g(0.06)</sub>               | 2.61  | 2.51                 | 3/2g              | <sup>2</sup> Δ <sub>g(0.80)</sub> <sup>2</sup> Π <sub>g(0.13)</sub>               | 2.71  |                    |
| 3/2g              | <sup>2</sup> Π <sub>g(0.87)</sub> <sup>2</sup> Δ <sub>g(0.06)</sub>               | 3.33  |                      | 3/2g              | <sup>2</sup> Π <sub>g(0.82)</sub> <sup>2</sup> Δ <sub>g(0.10)</sub>               | 4.02  |                    |
| AgBr <sub>2</sub> |                                                                                   |       |                      | AuBr <sub>2</sub> |                                                                                   |       |                    |
| 3/2g              | <sup>2</sup> Π <sub>g(0.94)</sub>                                                 |       |                      | 3/2g              | <sup>2</sup> Π <sub>g(0.92)</sub> <sup>2</sup> Δ <sub>g(0.02)</sub>               |       |                    |
| 1/2g              | <sup>2</sup> Π <sub>g(0.91)</sub> <sup>2</sup> Σ <sub>g</sub> <sup>+</sup> (0.03) | 0.29  | 0.29                 | 1/2g              | <sup>2</sup> Π <sub>g(0.85)</sub> <sup>2</sup> Σ <sub>g</sub> <sup>+</sup> (0.09) | 0.40  | 0.35               |
| 1/2g              | <sup>2</sup> Σ <sub>g</sub> <sup>+</sup> (0.91) <sup>2</sup> Π <sub>g(0.03)</sub> | 0.60  | 0.66                 | 1/2g              | <sup>2</sup> Σ <sub>g</sub> <sup>+</sup> (0.84) <sup>2</sup> Π <sub>g(0.10)</sub> | 1.25  | 1.03               |
| 3/2u              | <sup>2</sup> Π <sub>u(0.94)</sub>                                                 | 0.89  | 0.46                 | 3/2u              | <sup>2</sup> Π <sub>u(0.94)</sub>                                                 | 1.64  | 1.26               |
| 1/2u              | <sup>2</sup> Π <sub>u(0.58)</sub> <sup>2</sup> Σ <sub>u</sub> <sup>+</sup> (0.37) | 1.03  | 0.60                 | 1/2u              | <sup>2</sup> Π <sub>u(0.61)</sub> <sup>2</sup> Σ <sub>u</sub> <sup>+</sup> (0.33) | 1.85  | 1.50               |
| 1/2u              | <sup>2</sup> Σ <sub>u</sub> <sup>+</sup> (0.57) <sup>2</sup> Π <sub>u(0.38)</sub> | 1.45  | 1.03                 | 5/2g              | <sup>2</sup> Δ <sub>g(0.93)</sub>                                                 | 1.77  |                    |
| 5/2g              | <sup>2</sup> Δ <sub>g(0.92)</sub>                                                 | 2.63  | 2.42                 | 1/2u              | <sup>2</sup> Σ <sub>u</sub> <sup>+</sup> (0.62) <sup>2</sup> Π <sub>u(0.33)</sub> | 2.18  |                    |
| 3/2g              | <sup>2</sup> Δ <sub>g(0.76)</sub> <sup>2</sup> Π <sub>g(0.16)</sub>               | 2.97  | 2.85                 | 3/2g              | <sup>2</sup> Δ <sub>g(0.69)</sub> <sup>2</sup> Π <sub>g(0.24)</sub>               | 2.77  |                    |
| 3/2g              | <sup>2</sup> Π <sub>g(0.76)</sub> <sup>2</sup> Δ <sub>g(0.16)</sub>               | 3.46  |                      | 3/2g              | <sup>2</sup> Π <sub>g(0.70)</sub> <sup>2</sup> Δ <sub>g(0.22)</sub>               | 3.85  |                    |
| AgI <sub>2</sub>  |                                                                                   |       |                      | AuI <sub>2</sub>  |                                                                                   |       |                    |
| 3/2g              | <sup>2</sup> Π <sub>g(0.94)</sub>                                                 |       |                      | 3/2g              | <sup>2</sup> Π <sub>g(0.93)</sub> <sup>2</sup> Δ <sub>g(0.01)</sub>               |       |                    |
| 1/2g              | <sup>2</sup> Π <sub>g(0.81)</sub> <sup>2</sup> Σ <sub>g</sub> <sup>+</sup> (0.13) | 0.51  | 0.53                 | 1/2g              | <sup>2</sup> Π <sub>g(0.91)</sub> <sup>2</sup> Σ <sub>g</sub> <sup>+</sup> (0.04) | 0.64  | 0.62               |
| 3/2u              | <sup>2</sup> Π <sub>u(0.95)</sub>                                                 | 0.63  |                      | 3/2u              | <sup>2</sup> Π <sub>u(0.94)</sub>                                                 | 1.12  | 0.90               |
| 1/2u              | <sup>2</sup> Σ <sub>u</sub> <sup>+</sup> (0.51) <sup>2</sup> Π <sub>u(0.44)</sub> | 0.76  |                      | 1/2u              | <sup>2</sup> Σ <sub>u</sub> <sup>+</sup> (0.51) <sup>2</sup> Π <sub>u(0.43)</sub> | 1.32  | 1.13               |
| 1/2g              | <sup>2</sup> Σ <sub>g</sub> <sup>+</sup> (0.80) <sup>2</sup> Π <sub>g(0.14)</sub> | 1.18  | 1.40                 | 1/2g              | <sup>2</sup> Σ <sub>g</sub> <sup>+</sup> (0.90) <sup>2</sup> Π <sub>g(0.04)</sub> | 1.55  | 1.44               |
| 1/2u              | <sup>2</sup> Π <sub>u(0.52)</sub> <sup>2</sup> Σ <sub>u</sub> <sup>+</sup> (0.42) | 1.65  |                      | 1/2u              | <sup>2</sup> Π <sub>u(0.53)</sub> <sup>2</sup> Σ <sub>u</sub> <sup>+</sup> (0.41) | 2.13  | 1.98               |
| 5/2g              | <sup>2</sup> Δ <sub>g(0.91)</sub>                                                 | 3.24  | 3.37                 | 5/2g              | <sup>2</sup> Δ <sub>g(0.92)</sub>                                                 | 2.13  |                    |
| 3/2g              | <sup>2</sup> Π <sub>g(0.58)</sub> <sup>2</sup> Δ <sub>g(0.33)</sub>               | 3.92  |                      | 3/2g              | <sup>2</sup> Π <sub>g(0.52)</sub> <sup>2</sup> Δ <sub>g(0.39)</sub>               | 3.96  |                    |
| 3/2g              | <sup>2</sup> Δ <sub>g(0.58)</sub> <sup>2</sup> Π <sub>g(0.33)</sub>               | 3.51  | 3.78                 | 3/2g              | <sup>2</sup> Δ <sub>g(0.52)</sub> <sup>2</sup> Π <sub>g(0.40)</sub>               | 2.92  |                    |

## References

- 1 S. Mishra, *Phys Chem Chem Phys.*, 2008, **10**, 3987-3991.
- 2 S. Mishra, V. Vallet and W. Domcke, *Chem. Phys. Chem.*, 2006, **7**, 723-727.
- 3 A. Ramírez-Solís, R. Poteau and J. P. Daudey, *J. Chem. Phys.*, 2006, **124**, 3221.
- 4 A. Ramírez-Solís, *J. Mol. Spectrosc.*, 2020, **373**, 111355.
- 5 A. Ramírez-Solís, *Int. J. Quantum Chem*, 2012, **112**, 3535-3542.
- 6 D. Schröder, R. Brown, P. Schwerdtfeger, X. B. Wang, X. Yang, L. S. Wang and H. Schwarz, *Angew. Chem.*, 2003, **115**, 323; *Angew. Chem. Int. Ed.*, 2003, **42**, 311-314.
